# Supplementary material for: A new quantitative approach to identify reworking in Eocene to Miocene pollen records from offshore Antarctica using red fluorescence and digital imaging
Source: Copernicus journal article supplement (doi:10.5194/bg-14-2089-2017), 2017-04-24
Supplement: Supplementary file 1 [file bg-14-2089-2017-supplement.pdf]

Supplement of Biogeosciences, 14, 2089–2100, 2017  
<http://www.biogeosciences.net/14/2089/2017/>  
doi:10.5194/bg-14-2089-2017-supplement  
© Author(s) 2017. CC Attribution 3.0 License.

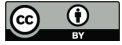

Biogeosciences  Open Access

*Supplement of*

## **A new quantitative approach to identify reworking in Eocene to Miocene pollen records from offshore Antarctica using red fluorescence and digital imaging**

**Stephanie L. Strother et al.**

*Correspondence to:* Stephanie L. Strother (slstrother2@gmail.com)  
and Ulrich Salzmann (ulrich.salzmann@northumbria.ac.uk)

The copyright of individual parts of the supplement might differ from the CC-BY 3.0 licence.

**Table S1:** Subjective assessment (optical appearance) and digital measurement (intensity, red, green, blue, saturation and brightness) of sporomorph fluorescence

| Total depth<br>(mbsf) | Age (Ma) | Taxa                             | Optical appearance | Area  | Intensity | Red   | Green  | Blue   | Saturation | Brightness |
|-----------------------|----------|----------------------------------|--------------------|-------|-----------|-------|--------|--------|------------|------------|
| 106.62                | 12.72    | <i>Cyathidites minor</i>         | 46                 | 7877  | 96.99     | 37.67 | 100.54 | 152.77 | 154.55     | 38.04      |
| 106.62                | 12.72    | <i>Nothofagidites flemingii</i>  | 46                 | 9003  | 110.51    | 39.92 | 113.78 | 177.82 | 163.81     | 43.34      |
| 106.62                | 12.72    | <i>Nothofagidites flemingii</i>  | 43                 | 10233 | 118.16    | 37.61 | 121.04 | 195.83 | 173.84     | 46.34      |
| 106.62                | 12.72    | <i>Nothofagidites flemingii</i>  | 43                 | 5188  | 75.52     | 28.07 | 77.16  | 121.33 | 160.08     | 29.61      |
| 106.62                | 12.72    | <i>Nothofagidites lachlaniae</i> | 43                 | 6943  | 102.53    | 38.03 | 103.23 | 166.33 | 160.42     | 40.21      |
| 106.62                | 12.72    | <i>Nothofagidites lachlaniae</i> | 46                 | 8278  | 96.22     | 34.84 | 101.25 | 152.57 | 164.04     | 37.73      |
| 106.62                | 12.72    | <i>Podocarpidites ellipticus</i> | 43                 | 14794 | 111.11    | 28.3  | 108.58 | 196.45 | 190.21     | 43.57      |
| 141.02                | 13.39    | <i>Cyathidites minor</i>         | 43                 | 9030  | 113.67    | 41.6  | 116.12 | 183.3  | 162.36     | 44.58      |
| 141.02                | 13.39    | <i>Myricipites harrisii</i>      | 44                 | 6023  | 158.66    | 59.27 | 173.59 | 243.13 | 160.32     | 62.22      |
| 141.02                | 13.39    | <i>Myricipites harrisii</i>      | 43                 | 16814 | 125.09    | 34.18 | 126.53 | 214.56 | 185.46     | 49.06      |
| 141.02                | 13.39    | <i>Nothofagidites flemingii</i>  | 44                 | 7482  | 92.66     | 33.01 | 93.99  | 150.99 | 165.03     | 36.34      |
| 141.02                | 13.39    | <i>Nothofagidites flemingii</i>  | 43                 | 5622  | 96.5      | 25.48 | 92.82  | 171.2  | 187.65     | 37.84      |
| 141.02                | 13.39    | <i>Nothofagidites lachlaniae</i> | 43                 | 6351  | 131.31    | 29.31 | 131.45 | 233.15 | 198.11     | 51.49      |
| 141.02                | 13.39    | <i>Nothofagidites flemingii</i>  | 42                 | 9955  | 120.74    | 40.35 | 124.91 | 196.95 | 170.15     | 47.35      |
| 141.02                | 13.39    | <i>Podocarpidites ellipticus</i> | 43                 | 20580 | 131.69    | 48.64 | 141.36 | 205.07 | 162.45     | 51.64      |
| 156.22                | 13.42    | <i>Nothofagidites flemingii</i>  | 43                 | 8067  | 86.5      | 23.44 | 83.68  | 152.39 | 185.84     | 33.92      |
| 156.22                | 13.42    | <i>Nothofagidites lachlaniae</i> | 46                 | 5899  | 76.27     | 34.48 | 79.49  | 114.85 | 140.12     | 29.91      |
| 156.22                | 13.42    | <i>Nothofagidites lachlaniae</i> | 43                 | 6311  | 76.78     | 37.72 | 82.56  | 110.07 | 130.65     | 30.11      |
| 156.22                | 13.42    | <i>Podocarpidites ellipticus</i> | 43                 | 20434 | 109.9     | 40.35 | 108.56 | 180.79 | 161.12     | 43.1       |
| 156.22                | 13.42    | <i>Nothofagidites flemingii</i>  | 43                 | 7065  | 76.03     | 19.19 | 73.47  | 135.42 | 190.69     | 29.81      |
| 202.62                | 14.06    | <i>Cyathidites minor</i>         | 46                 | 4994  | 65.58     | 30.34 | 69.93  | 96.48  | 137.97     | 25.72      |
| 202.62                | 14.06    | <i>Myricipites harissii</i>      | 43                 | 6403  | 100.64    | 58.03 | 111.35 | 132.55 | 110.42     | 39.47      |
| 202.62                | 14.06    | <i>Nothofagidites flemingii</i>  | 43                 | 7220  | 64.26     | 23.4  | 65.44  | 103.94 | 163.62     | 25.2       |
| 202.62                | 14.06    | <i>Nothofagidites lachlaniae</i> | 43                 | 6975  | 147.14    | 44.78 | 156.84 | 239.8  | 177.49     | 57.7       |
| 202.62                | 14.06    | <i>Podocarpidites ellipticus</i> | 43                 | 19754 | 112.6     | 30.19 | 110.88 | 196.73 | 187.53     | 44.16      |
| 202.62                | 14.06    | <i>Podocarpidites ellipticus</i> | 43                 | 15224 | 113.65    | 37.6  | 115.58 | 187.78 | 171.38     | 44.57      |
| 327.22                | 15.79    | <i>Nothofagidites flemingii</i>  | 45                 | 27164 | 118.28    | 53.39 | 128.16 | 173.28 | 141.58     | 46.38      |
| 327.22                | 15.79    | <i>Nothofagidites flemingii</i>  | 43                 | 6527  | 111.22    | 26.3  | 107.52 | 199.83 | 194.83     | 43.62      |
| 327.22                | 15.79    | <i>Podocarpidites ellipticus</i> | 45                 | 7882  | 131.31    | 32.69 | 130.29 | 230.95 | 191.61     | 51.49      |
| 416.25                | 19.25    | <i>Podocarpidites ellipticus</i> | 46                 | 21756 | 138.15    | 32.99 | 138.43 | 243.04 | 194.29     | 54.18      |

|        |       |                                  |    |       |        |       |        |        |        |       |
|--------|-------|----------------------------------|----|-------|--------|-------|--------|--------|--------|-------|
| 443.25 | 23.22 | <i>Nothofagidites flemingii</i>  | 43 | 8945  | 147.79 | 34.77 | 154.86 | 253.74 | 195.16 | 57.96 |
| 443.25 | 23.22 | <i>Podocarpidites ellipticus</i> | 46 | 12045 | 91.38  | 31.11 | 91.01  | 152.03 | 168.18 | 35.84 |
| 443.25 | 23.22 | <i>Podocarpidites ellipticus</i> | 46 | 7116  | 106.92 | 31.45 | 108.05 | 181.27 | 179.46 | 41.93 |
| 443.25 | 23.22 | <i>Cyathidites minor</i>         | 46 | 7071  | 91.73  | 22.82 | 87.62  | 164.76 | 190.17 | 35.97 |
| 443.25 | 23.22 | <i>Cyathidites minor</i>         | 46 | 13339 | 103.49 | 19.77 | 96.99  | 193.69 | 206.07 | 40.58 |
| 469.3  | 24.44 | <i>Cyathidites minor</i>         | 46 | 9800  | 129.55 | 31.26 | 128.65 | 228.76 | 193.49 | 50.81 |
| 469.3  | 24.44 | <i>Cyathidites minor</i>         | 46 | 7341  | 153.21 | 39.7  | 165.69 | 254.23 | 188.96 | 60.08 |
| 469.3  | 24.44 | <i>Nothofagidites lachlaniae</i> | 46 | 6162  | 129.66 | 30.59 | 129.3  | 229.08 | 194.89 | 50.85 |
| 469.3  | 24.44 | <i>Podocarpidites ellipticus</i> | 46 | 20406 | 129.7  | 32.88 | 132.03 | 224.21 | 190.45 | 50.86 |
| 469.3  | 24.44 | <i>Podocarpidites ellipticus</i> | 46 | 17096 | 87.32  | 33.96 | 92.64  | 135.36 | 157.03 | 34.24 |
| 469.3  | 24.44 | <i>Podocarpidites ellipticus</i> | 46 | 6693  | 127.38 | 32.86 | 127.27 | 222.01 | 189.35 | 49.95 |
| 469.3  | 24.44 | <i>Podocarpidites ellipticus</i> | 47 | 15534 | 158.1  | 36.89 | 182.41 | 255    | 195.55 | 62    |
| 507.62 | 24.90 | <i>Cyathidites minor</i>         | 46 | 9234  | 81.97  | 26.25 | 80.23  | 139.44 | 172.98 | 32.15 |
| 507.62 | 24.90 | <i>Nothofagidites lachlaniae</i> | 43 | 8068  | 110.02 | 31.87 | 109.96 | 188.23 | 180.55 | 43.15 |
| 507.62 | 24.90 | <i>Podocarpidites ellipticus</i> | 43 | 19584 | 98.68  | 34.65 | 97.98  | 163.4  | 165.05 | 38.7  |
| 507.62 | 24.90 | <i>Podocarpidites ellipticus</i> | 46 | 13950 | 125.1  | 35.52 | 125.68 | 214.09 | 183.01 | 49.06 |
| 507.62 | 24.90 | <i>Myricipites harrisii</i>      | 46 | 7894  | 119.81 | 33.59 | 120.68 | 205.15 | 183.13 | 46.98 |
| 507.62 | 24.90 | <i>Nothofagidites flemingii</i>  | 47 | 2738  | 94.96  | 22.05 | 90.29  | 172.53 | 195.33 | 37.24 |
| 537.31 | 24.90 | <i>Podocarpidites ellipticus</i> | 43 | 7932  | 81.5   | 23.54 | 77.79  | 143.19 | 180.39 | 31.96 |
| 537.31 | 24.90 | <i>Podocarpidites ellipticus</i> | 43 | 18196 | 109.69 | 27.35 | 106.7  | 195.01 | 191.26 | 43.01 |
| 555.19 | 24.90 | <i>Cyathidites minor</i>         | 43 | 17482 | 147.8  | 32.34 | 157.36 | 253.68 | 199.33 | 57.96 |
| 555.19 | 24.90 | <i>Cyathidites minor</i>         | 46 | 10771 | 110.37 | 25.09 | 101.86 | 204.15 | 196.99 | 43.28 |
| 555.19 | 24.90 | <i>Myricipites harrisii</i>      | 46 | 6970  | 162.75 | 56.45 | 184.86 | 246.94 | 166.6  | 63.82 |
| 555.19 | 24.90 | <i>Myricipites harrisii</i>      | 46 | 8273  | 132.46 | 46.57 | 139.74 | 211.08 | 163.91 | 51.95 |
| 555.19 | 24.90 | <i>Myricipites harrisii</i>      | 46 | 6999  | 125.91 | 51.31 | 130.48 | 195.94 | 151.49 | 49.38 |
| 555.19 | 24.90 | <i>Nothofagidites flemingii</i>  | 43 | 9744  | 122.03 | 21.72 | 119.17 | 225.18 | 209.64 | 47.85 |
| 555.19 | 24.90 | <i>Nothofagidites flemingii</i>  | 43 | 6229  | 153.06 | 40.02 | 166.34 | 252.8  | 188.33 | 60.02 |
| 555.19 | 24.90 | <i>Podocarpidites ellipticus</i> | 43 | 9248  | 161.73 | 44.81 | 185.41 | 254.99 | 184.5  | 63.43 |
| 555.19 | 24.90 | <i>Podocarpidites ellipticus</i> | 46 | 14789 | 118.43 | 35.5  | 119.2  | 200.58 | 178.76 | 46.44 |
| 555.19 | 24.90 | <i>Podocarpidites ellipticus</i> | 46 | 9504  | 126.46 | 38.57 | 127.72 | 213.09 | 177.47 | 49.59 |
| 795.58 | 30.63 | <i>Cyathidites minor</i>         | 46 | 13474 | 80.1   | 17.21 | 71.87  | 151.23 | 200.38 | 31.41 |
| 795.58 | 30.63 | <i>Myricipites harrisii</i>      | 46 | 7473  | 112.97 | 42.89 | 115.8  | 180.22 | 158.5  | 44.3  |
| 795.58 | 30.63 | <i>Nothofagidites lachlaniae</i> | 46 | 6996  | 79.27  | 19.34 | 72.9   | 145.57 | 192.98 | 31.09 |
| 795.58 | 30.63 | <i>Cyathidites minor</i>         | 47 | 9225  | 106.89 | 15.35 | 93.18  | 212.12 | 218.39 | 41.92 |
| 799.44 | 30.76 | <i>Myricipites harrisii</i>      | 46 | 7364  | 96.98  | 39.85 | 96.05  | 155.05 | 150.69 | 38.03 |

|        |       |                                  |    |       |        |       |        |        |        |       |
|--------|-------|----------------------------------|----|-------|--------|-------|--------|--------|--------|-------|
| 799.44 | 30.76 | <i>Podocarpidites ellipticus</i> | 46 | 8792  | 143.78 | 39    | 152.73 | 239.62 | 185.4  | 56.39 |
| 799.44 | 30.76 | <i>Podocarpidites ellipticus</i> | 46 | 9551  | 49.36  | 19.62 | 48.27  | 80.2   | 155.84 | 19.36 |
| 803.62 | 30.89 | <i>Podocarpidites ellipticus</i> | 44 | 17516 | 180.78 | 52.07 | 235.27 | 255    | 181.54 | 70.89 |
| 803.62 | 30.89 | <i>Podocarpidites ellipticus</i> | 46 | 13103 | 149.14 | 37.85 | 164.48 | 245.09 | 189.73 | 58.49 |
| 806.58 | 30.98 | <i>Myricipites harrisii</i>      | 43 | 7633  | 119.74 | 34.52 | 118.99 | 205.72 | 181.15 | 46.96 |
| 806.58 | 30.98 | <i>Podocarpidites ellipticus</i> | 46 | 12014 | 164.63 | 47.4  | 191.68 | 254.82 | 181.64 | 64.56 |
| 806.58 | 30.98 | <i>Podocarpidites ellipticus</i> | 46 | 18413 | 145.82 | 32.24 | 155.7  | 249.53 | 198.75 | 57.19 |
| 807.23 | 31.00 | <i>Podocarpidites ellipticus</i> | 46 | 9903  | 67.28  | 19.23 | 62.35  | 120.25 | 182.06 | 26.38 |
| 807.23 | 31.00 | <i>Nothofagidites lachlaniae</i> | 46 | 6641  | 123.78 | 25.16 | 115.43 | 230.75 | 203.25 | 48.54 |
| 808.53 | 31.05 | <i>Myricipites harrisii</i>      | 46 | 6038  | 97.66  | 26.91 | 90.69  | 175.38 | 184.41 | 38.3  |
| 808.53 | 31.05 | <i>Nothofagidites lachlaniae</i> | 46 | 5663  | 108.64 | 24.36 | 99.33  | 202.21 | 197.74 | 42.6  |
| 808.53 | 31.05 | <i>Podocarpidites ellipticus</i> | 46 | 17865 | 124.61 | 18.53 | 112.52 | 242.77 | 217.1  | 48.87 |
| 809.74 | 31.09 | <i>Podocarpidites ellipticus</i> | 46 | 22686 | 67.85  | 14.1  | 58.87  | 130.58 | 202.01 | 26.61 |
| 809.74 | 31.09 | <i>Nothofagidites lachlaniae</i> | 46 | 6242  | 79.1   | 13.6  | 65.87  | 157.84 | 211.26 | 31.02 |
| 809.74 | 31.09 | <i>Nothofagidites lachlaniae</i> | 46 | 7866  | 136.75 | 23    | 132.5  | 254.75 | 212.14 | 53.63 |
| 830.02 | 31.74 | <i>Nothofagidites flemingii</i>  | 46 | 7290  | 155.29 | 34.17 | 176.7  | 255    | 198.94 | 60.9  |
| 830.02 | 31.74 | <i>Nothofagidites lachlaniae</i> | 46 | 6493  | 130.47 | 32.23 | 130.56 | 228.6  | 192.04 | 51.16 |
| 883.75 | 33.35 | <i>Myricipites harrisii</i>      | 47 | 9374  | 77.92  | 21.46 | 75.28  | 137.01 | 184.27 | 30.56 |
| 883.75 | 33.35 | <i>Nothofagidites lachlaniae</i> | 47 | 7520  | 70.99  | 15.18 | 67.43  | 130.35 | 199.52 | 27.84 |
| 885.59 | 33.37 | <i>Podocarpidites ellipticus</i> | 47 | 14919 | 134.9  | 27.32 | 136.09 | 241.28 | 203.22 | 52.9  |
| 885.59 | 33.37 | <i>Cyathidites minor</i>         | 46 | 14170 | 107.71 | 19.56 | 99.6   | 203.96 | 208.62 | 42.24 |
| 885.59 | 33.37 | <i>Podocarpidites ellipticus</i> | 47 | 12407 | 123.67 | 24.57 | 118.57 | 227.86 | 204.21 | 48.5  |
| 885.71 | 33.38 | <i>Nothofagidites lachlaniae</i> | 45 | 8958  | 138.62 | 29.05 | 136.78 | 250.01 | 201.61 | 54.36 |
| 885.71 | 33.38 | <i>Podocarpidites ellipticus</i> | 46 | 12284 | 68.39  | 24.54 | 67.99  | 112.64 | 161.17 | 26.82 |
| 885.71 | 33.38 | <i>Podocarpidites ellipticus</i> | 46 | 34203 | 61.23  | 21.61 | 59.21  | 102.86 | 163.7  | 24.01 |
| 910.83 | 47.25 | <i>Nothofagidites flemingii</i>  | 46 | 10447 | 88.54  | 30.25 | 90.87  | 144.5  | 167.74 | 34.72 |
| 910.83 | 47.25 | <i>Nothofagidites flemingii</i>  | 47 | 11723 | 74.74  | 23.85 | 75.39  | 124.98 | 173.69 | 29.31 |
| 910.83 | 47.25 | <i>Nothofagidites flemingii</i>  | 46 | 8043  | 109.06 | 22.15 | 103.78 | 201.27 | 203.2  | 42.77 |
| 910.83 | 47.25 | <i>Nothofagidites lachlaniae</i> | 47 | 3972  | 63.52  | 22.71 | 65.45  | 102.41 | 164.2  | 24.91 |
| 920.83 | 48.40 | <i>Nothofagidites flemingii</i>  | 46 | 6505  | 54.4   | 16.92 | 54.81  | 91.45  | 174.98 | 21.33 |
| 931.3  | 48.57 | <i>Nothofagidites flemingii</i>  | 47 | 4411  | 58.33  | 20.34 | 59.37  | 95.26  | 165.78 | 22.87 |
| 931.3  | 48.57 | <i>Nothofagidites flemingii</i>  | 47 | 6166  | 59.14  | 18.05 | 59.48  | 99.89  | 176.36 | 23.19 |
| 931.3  | 48.57 | <i>Nothofagidites flemingii</i>  | 47 | 7643  | 65.6   | 22.79 | 66.15  | 107.86 | 165.94 | 25.73 |
| 931.3  | 48.57 | <i>Nothofagidites flemingii</i>  | 47 | 8092  | 59.72  | 20.15 | 60.31  | 98.7   | 167.34 | 23.42 |
| 931.3  | 48.57 | <i>Nothofagidites lachlaniae</i> | 47 | 4594  | 58.62  | 22.38 | 60.34  | 93.15  | 157.17 | 22.99 |

|        |       |                                  |    |       |        |       |        |        |        |       |
|--------|-------|----------------------------------|----|-------|--------|-------|--------|--------|--------|-------|
| 939.37 | 48.64 | <i>Cyathidites minor</i>         | 47 | 3856  | 97.91  | 22.98 | 94.25  | 176.5  | 195.18 | 38.39 |
| 939.37 | 48.64 | <i>Nothofagidites flemingii</i>  | 47 | 10121 | 62.68  | 17.05 | 62.21  | 108.77 | 184.72 | 24.58 |
| 939.37 | 48.64 | <i>Nothofagidites flemingii</i>  | 46 | 8100  | 96.11  | 26.41 | 95.12  | 166.79 | 184.93 | 37.69 |
| 939.37 | 48.64 | <i>Nothofagidites lachlaniae</i> | 46 | 4715  | 66.51  | 26.66 | 69.47  | 103.42 | 153.49 | 26.08 |
| 939.37 | 48.64 | <i>Podocarpidites ellipticus</i> | 46 | 16160 | 61.81  | 20.52 | 61.62  | 103.29 | 169.58 | 24.24 |
| 951.31 | 52.31 | <i>Nothofagidites flemingii</i>  | 46 | 7448  | 135.22 | 39.71 | 140.28 | 225.69 | 180.69 | 53.03 |
| 951.31 | 52.31 | <i>Nothofagidites flemingii</i>  | 44 | 8938  | 94.35  | 36.27 | 98.58  | 148.19 | 156.17 | 37    |
| 951.31 | 52.31 | <i>Podocarpidites ellipticus</i> | 47 | 20506 | 96.09  | 35.56 | 95.93  | 156.77 | 159.74 | 37.68 |
| 951.51 | 52.32 | <i>Nothofagidites flemingii</i>  | 46 | 5335  | 83.14  | 19.59 | 81.31  | 148.5  | 194.86 | 32.6  |
| 951.51 | 52.32 | <i>Nothofagidites flemingii</i>  | 46 | 8979  | 121.41 | 26.21 | 119.72 | 218.31 | 199.87 | 47.61 |
| 951.51 | 52.32 | <i>Podocarpidites ellipticus</i> | 47 | 18507 | 87.07  | 19.92 | 82.75  | 158.53 | 196.06 | 34.14 |
| 951.51 | 52.32 | <i>Podocarpidites ellipticus</i> | 48 | 15808 | 69.47  | 15.27 | 67.01  | 126.14 | 198.69 | 27.24 |
| 951.51 | 52.32 | <i>Podocarpidites ellipticus</i> | 47 | 8215  | 96.06  | 26.53 | 94.84  | 166.8  | 183.88 | 37.67 |
| 951.51 | 52.32 | <i>Podocarpidites ellipticus</i> | 47 | 17380 | 75.34  | 16.58 | 73     | 136.44 | 197.94 | 29.55 |
| 994.88 | 53.61 | <i>Cyathidites minor</i>         | 47 | 13611 | 61.16  | 12.46 | 59.09  | 111.94 | 202.69 | 23.98 |
| 994.88 | 53.61 | <i>Nothofagidites flemingii</i>  | 46 | 7309  | 143.11 | 28.94 | 149.84 | 250.56 | 203.47 | 56.12 |
| 994.88 | 53.61 | <i>Podocarpidites ellipticus</i> | 46 | 13111 | 109.96 | 24.47 | 108.58 | 196.84 | 197.84 | 43.12 |
| 998.99 | 54.39 | <i>Myricipites harrisii</i>      | 46 | 8065  | 108.29 | 37.28 | 107.35 | 180.24 | 167.41 | 42.47 |
| 998.99 | 54.39 | <i>Nothofagidites flemingii</i>  | 44 | 8783  | 66.8   | 18.29 | 64.55  | 117.56 | 185.33 | 26.19 |
| 998.99 | 54.39 | <i>Podocarpidites ellipticus</i> | 47 | 11092 | 86.61  | 21.15 | 82.89  | 155.78 | 191.86 | 33.96 |

**Table S2. ANISOM results showing the Global R and p-values between the factors: Stage (Eocene, Oligocene and Miocene), Fluorescence colour, Depth and Taxa to understand if these factors had any influence on the similarity of fluorescence values.**

| Factor              | Outside histogram of chance | Global R | p-value |
|---------------------|-----------------------------|----------|---------|
| Stage               | Yes                         | 0.145    | 0.001   |
| Fluorescence colour | No                          | 0.085    | 0.011   |
| Depth               | Yes                         | 0.315    | 0.001   |
| Taxa                | No                          | 0.006    | 0.385   |
